# Supplementary material
Source: ML conference proceedings conference paper supplement (https://openreview.net/forum?id=J1SzMZn5lH)

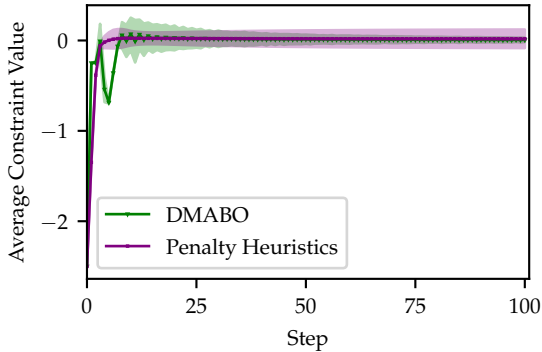

Supplement: supplementary_material [file attachment]

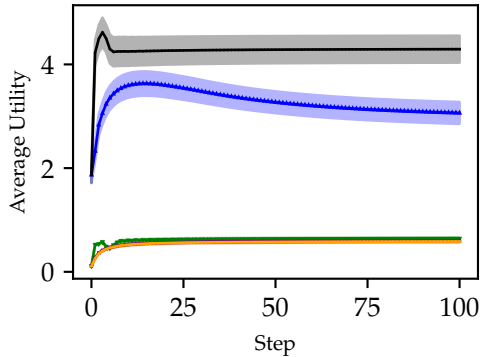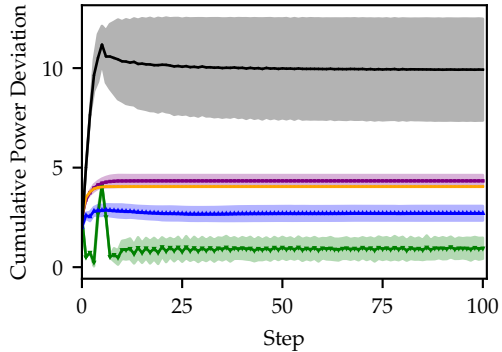

DMABO

Penalty Heuristics-5

Penalty Heuristics-20

Supplement: supplementary_material [file attachment]

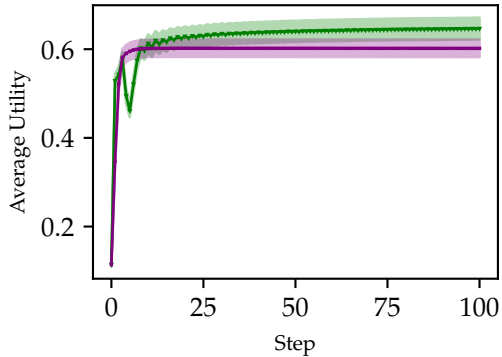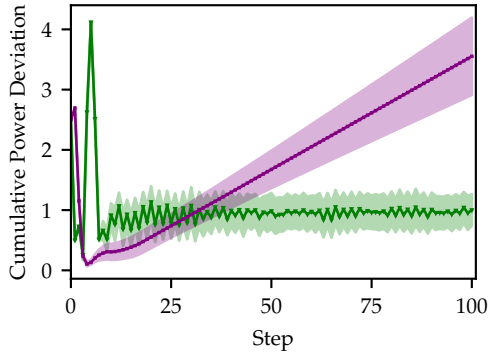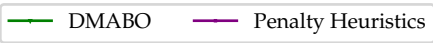

Supplement: supplementary_material [file attachment]

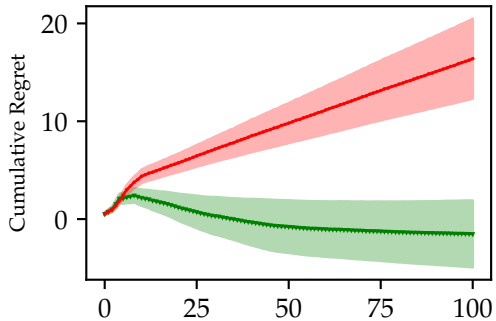

Step

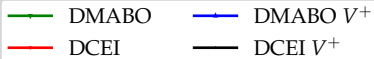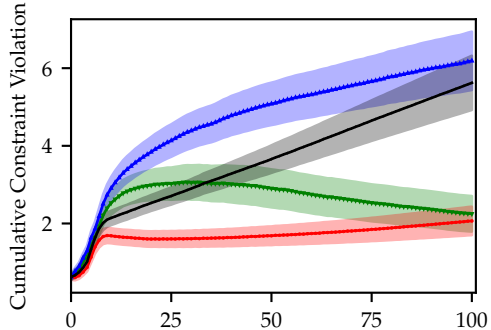

Step

Supplement: supplementary_material [file attachment]

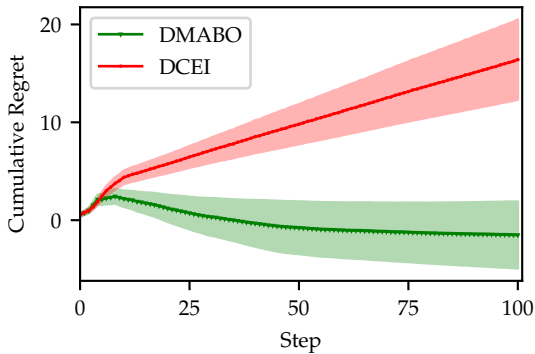

Supplement: supplementary_material [file attachment]

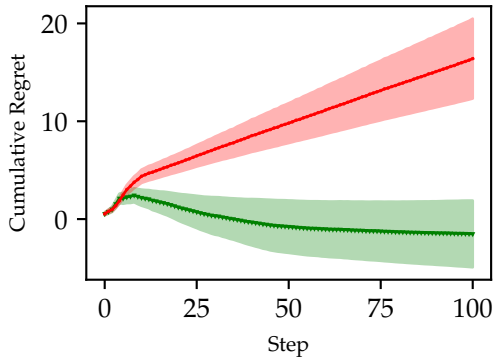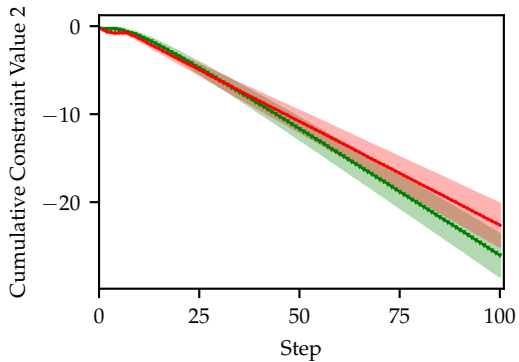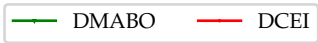

Supplement: supplementary_material [file attachment]

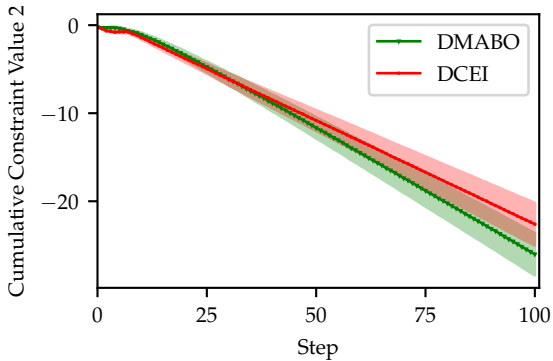

Supplement: supplementary_material [file attachment]
